# Supplementary material
Source: PubMed Central journal article supplement (PMC6934385)
Supplement: supp_7.4.E754_2019-0176-1-at.pdf [file supp_7.4.E754_2019-0176-1-at.pdf]

## Appendix 1 (as supplied by the authors): Data sets used

| <b>Data Set</b>                            | <b>Description of Data Set &amp; Data Used</b>                                                                                                                                                         | <b>Variable</b>                                                     |
|--------------------------------------------|--------------------------------------------------------------------------------------------------------------------------------------------------------------------------------------------------------|---------------------------------------------------------------------|
| <b>Manitoba Health Insurance Registry</b>  | Demographic information for all residents of Manitoba Eligible to receive healthcare services                                                                                                          | Demographic information                                             |
| <b>Indian Registry System (IRS)</b>        | List of all status FN people, including residence on or off-reserve                                                                                                                                    | FN status<br>Residence on or off-reserve                            |
| <b>Manitoba Cancer Registry (MCR)</b>      | Information on all incident cases of diagnosed cancer, cancer treatment, tumor characteristics, cancer site and stage at diagnosis.                                                                    | Cancer incidence<br>Cancer stage at diagnosis<br>Cancer site        |
| <b>Hospital Abstracts</b>                  | International Classification of Diseases (ICD-9-CM and ICD-10-CA) diagnostic codes and Canadian Classification for Health Interventions (CCI) procedure codes for all hospital admissions in Manitoba. | Patient co-morbidities<br>Patient socio-demographic characteristics |
| <b>Medical Services</b>                    | Claims submitted for physician and nurse practitioner services provided in Manitoba (and the associated ICD-9-CM)                                                                                      | Patient co-morbidities<br>Patient socio-demographic characteristics |
| <b>Census of Canada</b>                    | Aggregate data file used to create quintiles of area-level income                                                                                                                                      | Socioeconomic characteristics                                       |
| <b>Vital Statistics Mortality Registry</b> | Records all deaths in Manitoba and the primary cause of death                                                                                                                                          | Mortality                                                           |
