# Supplementary material
Source: PubMed Central journal article supplement (PMC6934385)
Supplement: supp_7.4.E754_2019-0176-reviewer-comments.pdf [file supp_7.4.E754_2019-0176-reviewer-comments.pdf]

| <b>Article details: 2019-0176</b>          |                                                                                                                                                                                                                                                                                                                                                                                                                                                                                                                                                                                                                                                                                                                                                                                                                                                                                                                                                                                                                                                                                                                                                                                                                                                                                                                                                                                                                                                                                                                                                                                                                                                                                                                                                                                                                                                                                                                                                                                      |
|--------------------------------------------|--------------------------------------------------------------------------------------------------------------------------------------------------------------------------------------------------------------------------------------------------------------------------------------------------------------------------------------------------------------------------------------------------------------------------------------------------------------------------------------------------------------------------------------------------------------------------------------------------------------------------------------------------------------------------------------------------------------------------------------------------------------------------------------------------------------------------------------------------------------------------------------------------------------------------------------------------------------------------------------------------------------------------------------------------------------------------------------------------------------------------------------------------------------------------------------------------------------------------------------------------------------------------------------------------------------------------------------------------------------------------------------------------------------------------------------------------------------------------------------------------------------------------------------------------------------------------------------------------------------------------------------------------------------------------------------------------------------------------------------------------------------------------------------------------------------------------------------------------------------------------------------------------------------------------------------------------------------------------------------|
| Title                                      | Comparing cancer incidence, stage at diagnosis and outcomes of Manitoba First Nations living on reserve and off reserve: a retrospective population-based analysis                                                                                                                                                                                                                                                                                                                                                                                                                                                                                                                                                                                                                                                                                                                                                                                                                                                                                                                                                                                                                                                                                                                                                                                                                                                                                                                                                                                                                                                                                                                                                                                                                                                                                                                                                                                                                   |
| Authors                                    | Tara C. Horrill BN PhD(c) RN, Lindsey Dahl MSc, Esther Sanderson, Garry Munro, Cindy Garson, Randy Fransoo PhD, Genevieve Thompson, PhD, RN, Catherine Cook MD MSc, Janice Linton MLS, Annette S. H. Schultz PhD RN                                                                                                                                                                                                                                                                                                                                                                                                                                                                                                                                                                                                                                                                                                                                                                                                                                                                                                                                                                                                                                                                                                                                                                                                                                                                                                                                                                                                                                                                                                                                                                                                                                                                                                                                                                  |
| <b>Reviewer 1</b>                          | Withheld                                                                                                                                                                                                                                                                                                                                                                                                                                                                                                                                                                                                                                                                                                                                                                                                                                                                                                                                                                                                                                                                                                                                                                                                                                                                                                                                                                                                                                                                                                                                                                                                                                                                                                                                                                                                                                                                                                                                                                             |
| Institution                                | Withheld                                                                                                                                                                                                                                                                                                                                                                                                                                                                                                                                                                                                                                                                                                                                                                                                                                                                                                                                                                                                                                                                                                                                                                                                                                                                                                                                                                                                                                                                                                                                                                                                                                                                                                                                                                                                                                                                                                                                                                             |
| General comments (author response in bold) | <b>Changes to the manuscript as a result of reviewer comments are highlighted [actual highlighted text] throughout the manuscript.</b>                                                                                                                                                                                                                                                                                                                                                                                                                                                                                                                                                                                                                                                                                                                                                                                                                                                                                                                                                                                                                                                                                                                                                                                                                                                                                                                                                                                                                                                                                                                                                                                                                                                                                                                                                                                                                                               |
| <b>Reviewer 2</b>                          | Chandima Karunanayake                                                                                                                                                                                                                                                                                                                                                                                                                                                                                                                                                                                                                                                                                                                                                                                                                                                                                                                                                                                                                                                                                                                                                                                                                                                                                                                                                                                                                                                                                                                                                                                                                                                                                                                                                                                                                                                                                                                                                                |
| Institution                                | University of Saskatchewan, Canadian Centre for Health and Safety in Agriculture                                                                                                                                                                                                                                                                                                                                                                                                                                                                                                                                                                                                                                                                                                                                                                                                                                                                                                                                                                                                                                                                                                                                                                                                                                                                                                                                                                                                                                                                                                                                                                                                                                                                                                                                                                                                                                                                                                     |
| General comments (author response in bold) | <p>Comments to the Author</p> <p>This paper discussed about cancer incidence, stage at diagnosis and outcomes of Manitoba First Nations living on and off reserve.</p> <p>The aim of this study was to investigate demographics, comorbidities, site, and stage of cancer on and off reserve First Nation people, compare annual incidence rates, and investigate the mortality outcomes for each cohort.</p> <p>This study is important for Manitoba Health Services to improve the access to care for Status First Nations.</p> <p>Few points to consider for revisions:</p> <ol style="list-style-type: none"> <li>1. 'Registered' vs 'Status' First Nations. Are they the same? Introduce the two definitions and if they are same try to keep one definition throughout the text. Is it 'Status' or 'status' with small s?</li> <li>2. First line of the introduction- is it 'addressing cancer incidence' or something else?</li> <li>3. Page 6, line 10: More details about Charlson Comorbidity Index. What comorbidities are included? What is the range? What does lower and higher values indicate?</li> <li>4. Page 7, line 36: "All analysis was ...." Need to move to before line 31 in page 6.</li> <li>5. Page 8, line 31: should be 2008/2009</li> <li>6. Page 8, line 38: Trends over time linear regression models need to present. Need to show the adjusted table of results.</li> <li>7. You can combine Table 3 and Table 4.</li> <li>8. You can combine Table 5 and Table 6.</li> <li>9. Page 26, Table 7 heading need to be corrected: "Hazard Ratios".</li> <li>10. Table 7: Need to add a footnote to Table 7, specifying the variables adjusted for each model.</li> </ol> <p>Other comments: Discussing similarities and differences among other provinces results will add more value to this paper.</p> <p><b>Changes to the manuscript as a result of reviewer comments are highlighted [actual highlighted text] throughout the manuscript.</b></p> |
